# Supplementary material for: Authentication of Hippophae rhamnoides ssp. sinensis and ssp. mongolica Based on Single Nucleotide Polymorphism at Ribosomal DNA and Their Vitamin Content Analysis
Source: MDPI journal article supplement (doi:10.3390/plants11141843), 2022-07-14
Supplement: s1 [file s1]

Supplementary Figure S1. Complete multiple alignment of all SB samples used in this research along with the sequences obtained from NCBI databsae.

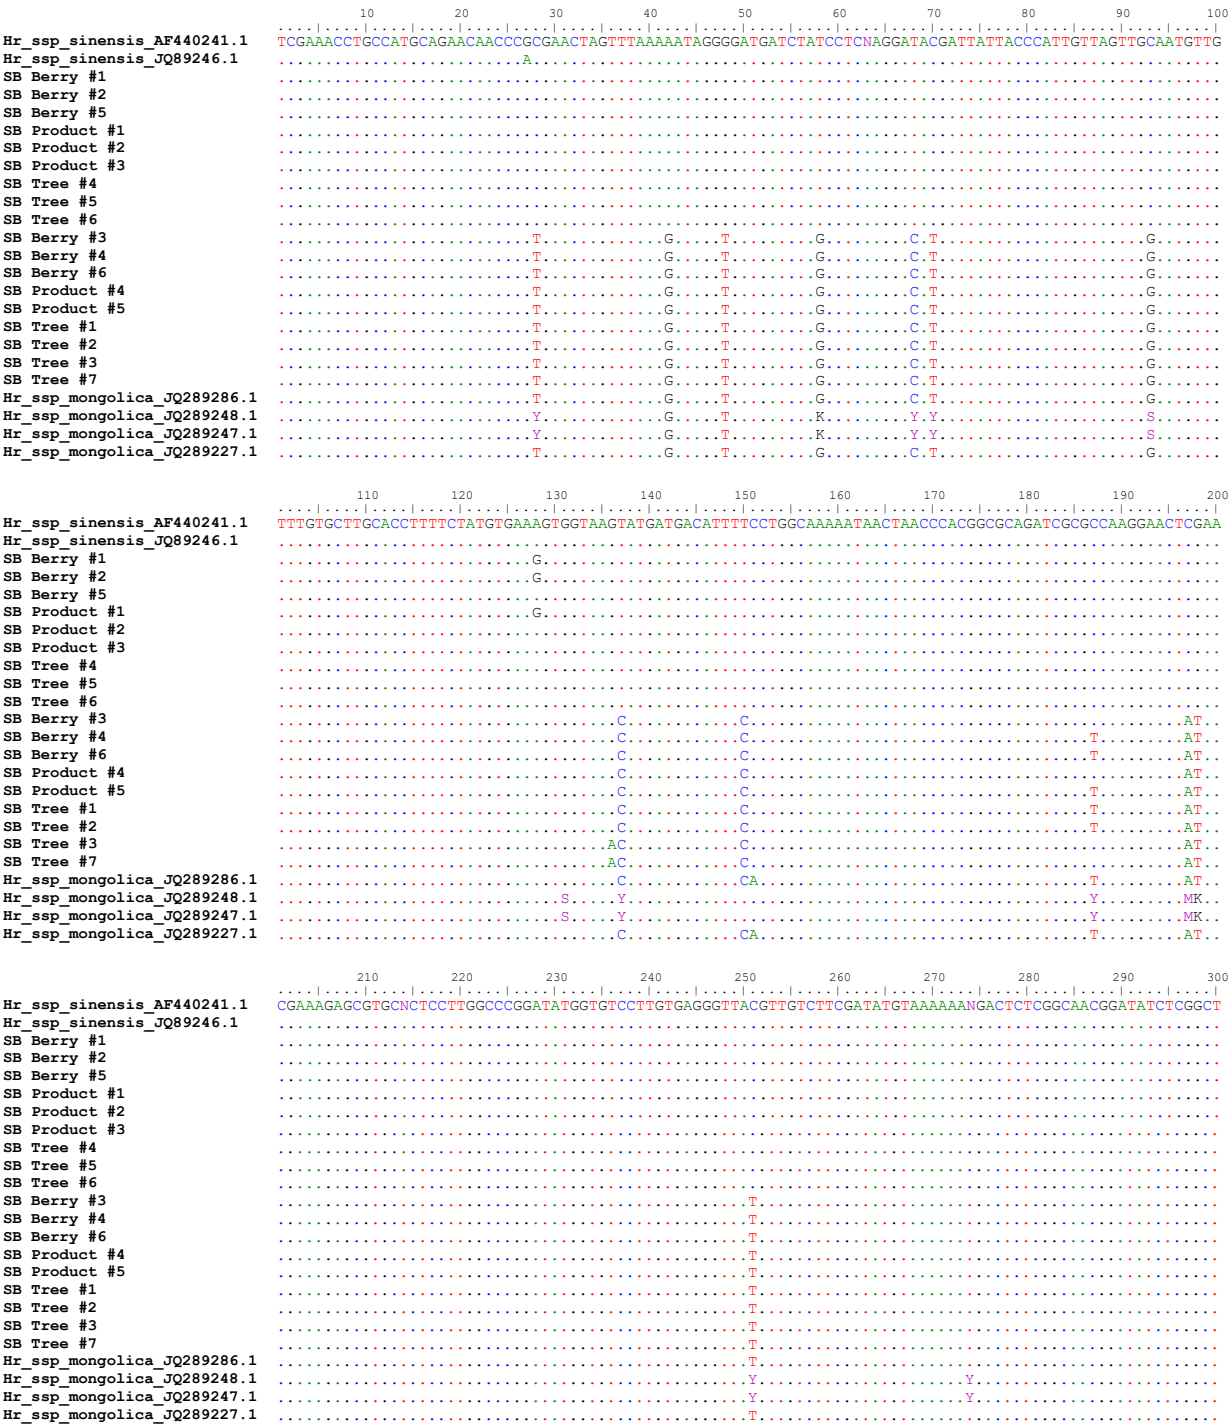

[illegible]
